# Supplementary material for: Carboxymethylcellulose ammonium-derived nitrogen-doped carbon fiber/molybdenum disulfide hybrids for high-performance supercapacitor electrodes
Source: Royal Society of Chemistry journal article supplement (doi:10.1039/c8ra04492a), 2018-01-01
Supplement: c8ra04492a1.pdf [file c8ra04492a1.pdf]

Supplementary Information

**Carboxymethylcellulose ammonium-derived nitrogen-doped  
carbon fibers/molybdenum disulfide hybrids for high-  
performance supercapacitor electrodes**

Yanyan Lv,<sup>a</sup> Yi Zhou,<sup>a</sup> Ziqiang Shao<sup>\*a</sup>, Jie Wei,<sup>a</sup> Lei Li,<sup>a</sup> Yiping Wang<sup>b</sup>

<sup>a</sup> Beijing Engineering Research Center of Cellulose and Its Derivatives, School of Materials Science and Engineering, Beijing Institute of Technology, Beijing, 100081, P. R. China.

<sup>b</sup> Nantong Tailida Chemical Co., Ltd, Jiangsu, 226000, P. R. China.

\* Email: [shaoziqiang@263.net](mailto:shaoziqiang@263.net)

Keywords: Carboxymethylcellulose ammonium, Nitrogen-doped carbon fibers, Molybdenum disulfide, Supercapacitors

**The SEM images of CMC-NH<sub>4</sub> and CMC-NH<sub>4</sub>/MoS<sub>2</sub> (Which is shown in next page)**

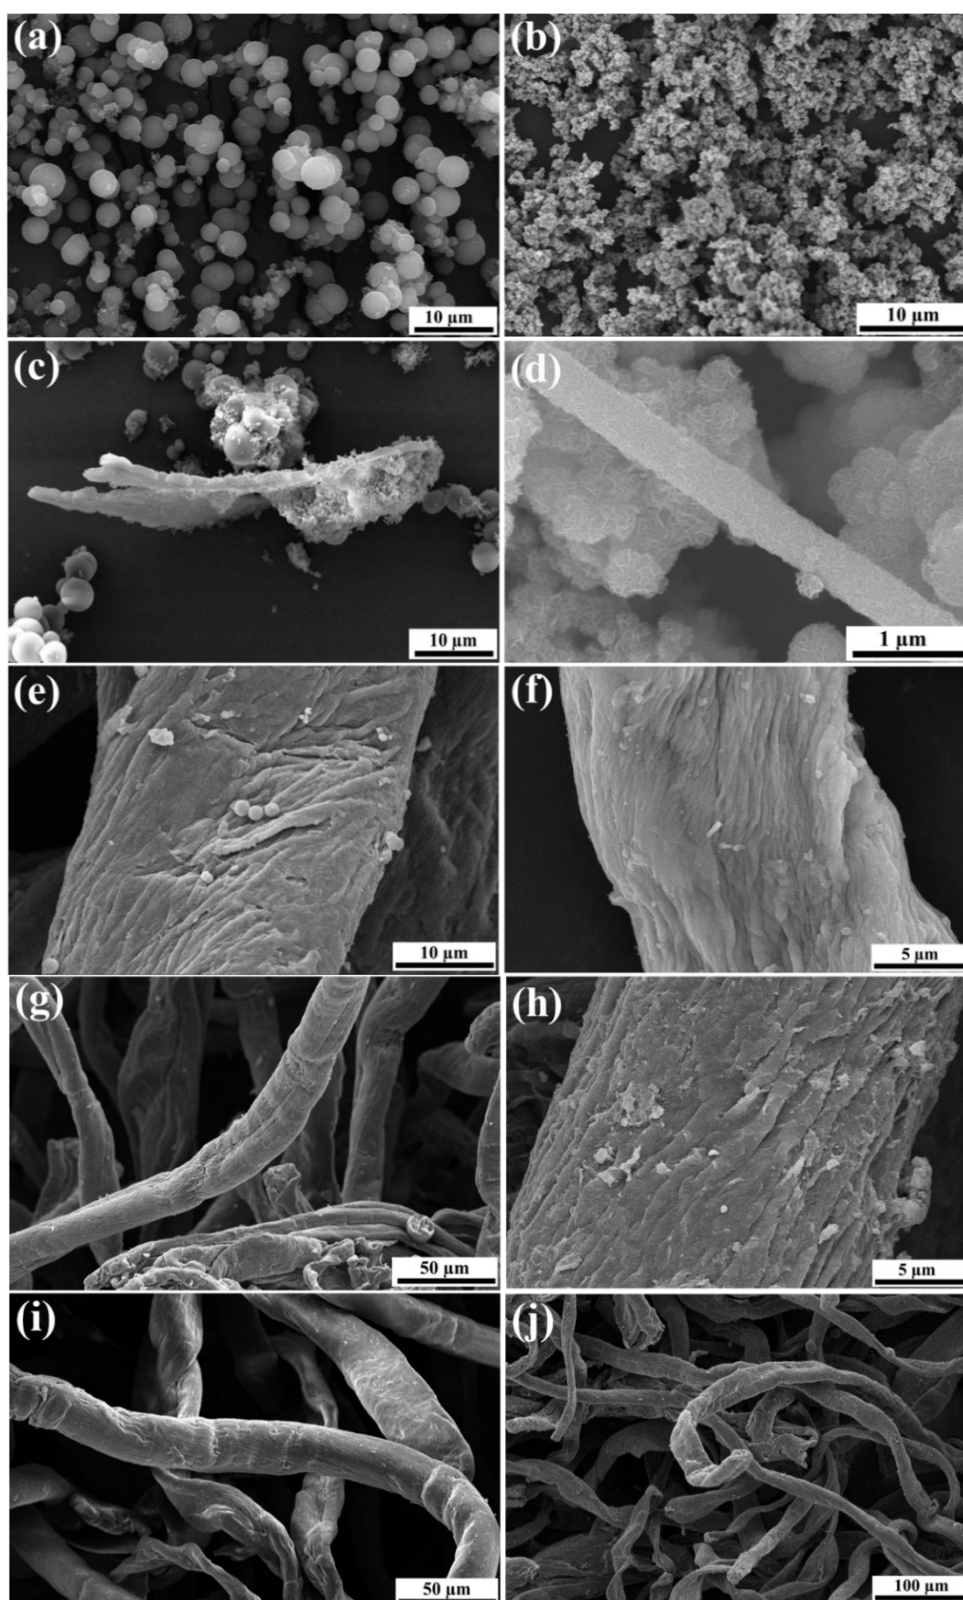

**Fig. S1** SEM images of CMC-NH<sub>4</sub> after solvothermal treatment with ethanol solution concentrations of (a) 0%, (c) 25%, (e) 50%, (g) 75%, (i) 100%; and CMC-NH<sub>4</sub>/MoS<sub>2</sub> prepared by solvothermal reaction at ethanol solution concentrations of (b) 0%, (d) 25%, (f) 50%, (h) 75%, (j) 100%.

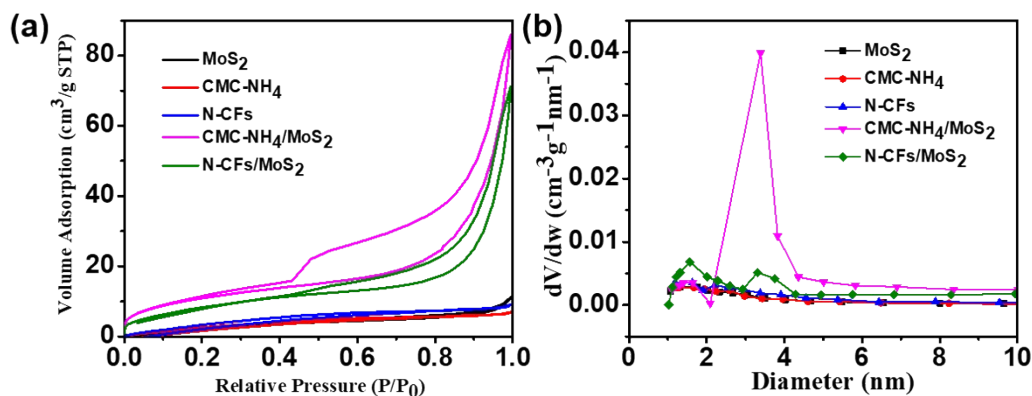

Fig. S2 N<sub>2</sub> adsorption/desorption isotherms and BJH pore size distribution curves of samples.

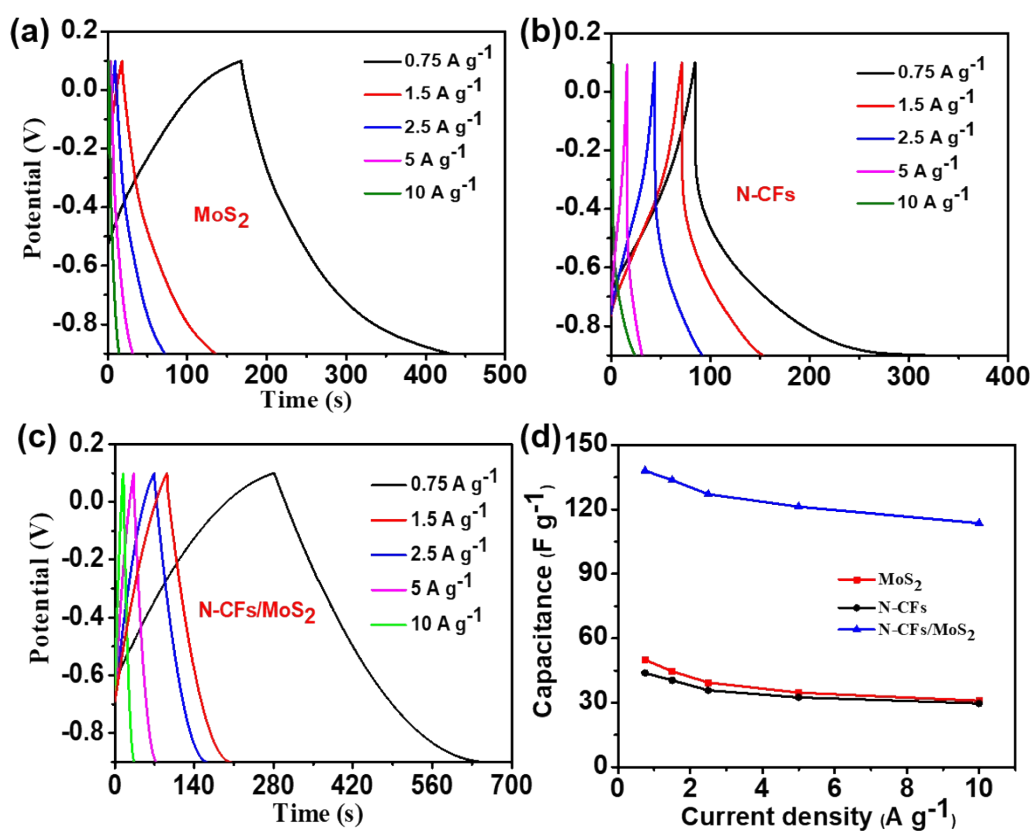

Fig. S3 Typical GCD curves of the (a) pure MoS<sub>2</sub>, (b) N-CFs, and (c) N-CFs/MoS<sub>2</sub> hybrids based symmetric supercapacitors at different current densities. (d) The specific capacitance of the symmetric supercapacitors at different current densities.
